# Supplementary material for: PPARα gene is a diagnostic and prognostic biomarker in clear cell renal cell carcinoma by integrated bioinformatics analysis
Source: PubMed Central journal article supplement — J Cancer. 2019 May 22;10(10):2319–31. doi: 10.7150/jca.29178 (PMC6584416; doi:10.7150/jca.29178), 2019-05-22
Supplement: jcav10p2319s1.pdf [file jcav10p2319s1.pdf]

## Supplementary files

**Supplementary Table S1. Expression and survival information of PPAR $\alpha$  in different solid tumors from TCGA data set.**

| Tumor type | Normal | Tumor | PPAR $\alpha$ in tumor | PPAR $\alpha$ survival | Survival p value |
|------------|--------|-------|------------------------|------------------------|------------------|
| BLCA       | 19     | 408   | Down                   | Non-significant        | 0.63             |
| BRCA       | 114    | 1097  | Down                   | Non-significant        | 0.98             |
| COAD       | 41     | 286   | Down                   | Non-significant        | 0.55             |
| LUAD       | 59     | 515   | Non-significant        |                        |                  |
| KIRC       | 72     | 533   | Down                   | Significant            | 0.00039***       |
| PAAD       | 4      | 178   | Non-significant        |                        |                  |
| PRAD       | 52     | 497   | Down                   | Non-significant        | 0.37             |
| LGG        | 0      | 503   | --                     |                        |                  |
| LUSC       | 52     | 503   | Up                     | Non-significant        | 0.98             |
| HNSC       | 44     | 520   | Non-significant        |                        |                  |
| KIPR       | 32     | 290   | Down                   | Non-significant        | 0.62             |
| ESCA       | 11     | 184   | Non-significant        |                        |                  |
| OV         | 0      | 302   | --                     | Non-significant        | 0.54             |
| LIHC       | 50     | 371   | Non-significant        |                        |                  |
| CESC       | 3      | 305   | Non-significant        |                        |                  |
| READ       | 10     | 166   | Non-significant        |                        |                  |
| UCEC       | 35     | 546   | Down                   | Non-significant        | 0.11             |
| THYM       | 2      | 121   | Non-significant        |                        |                  |
| THCA       | 59     | 505   | Down                   | Non-significant        | 0.48             |
| GBM        | 5      | 156   | Non-significant        |                        |                  |
| SARC       | 2      | 260   | Non-significant        |                        |                  |
| PCPG       | 3      | 179   | Down                   | Non-significant        | 0.18             |
| ACC        | 0      | 68    | --                     |                        |                  |
| UVM        | 0      | 79    | --                     |                        |                  |
| MESO       | 0      | 87    | --                     |                        |                  |
| UCS        | 0      | 56    | --                     |                        |                  |
| TGCT       | 0      | 129   | --                     |                        |                  |
| CHOL       | 9      | 36    | Down                   | Non-significant        | 0.6              |
| KICH       | 25     | 67    | Non-significant        |                        |                  |
| DLBC       | 0      | 41    | --                     |                        |                  |
| SKCM       | 1      | 472   | --                     |                        |                  |
| STAD       | 34     | 415   | Non-significant        |                        |                  |

\*\*\* p < 0.0001

## Supplementary Figure S1

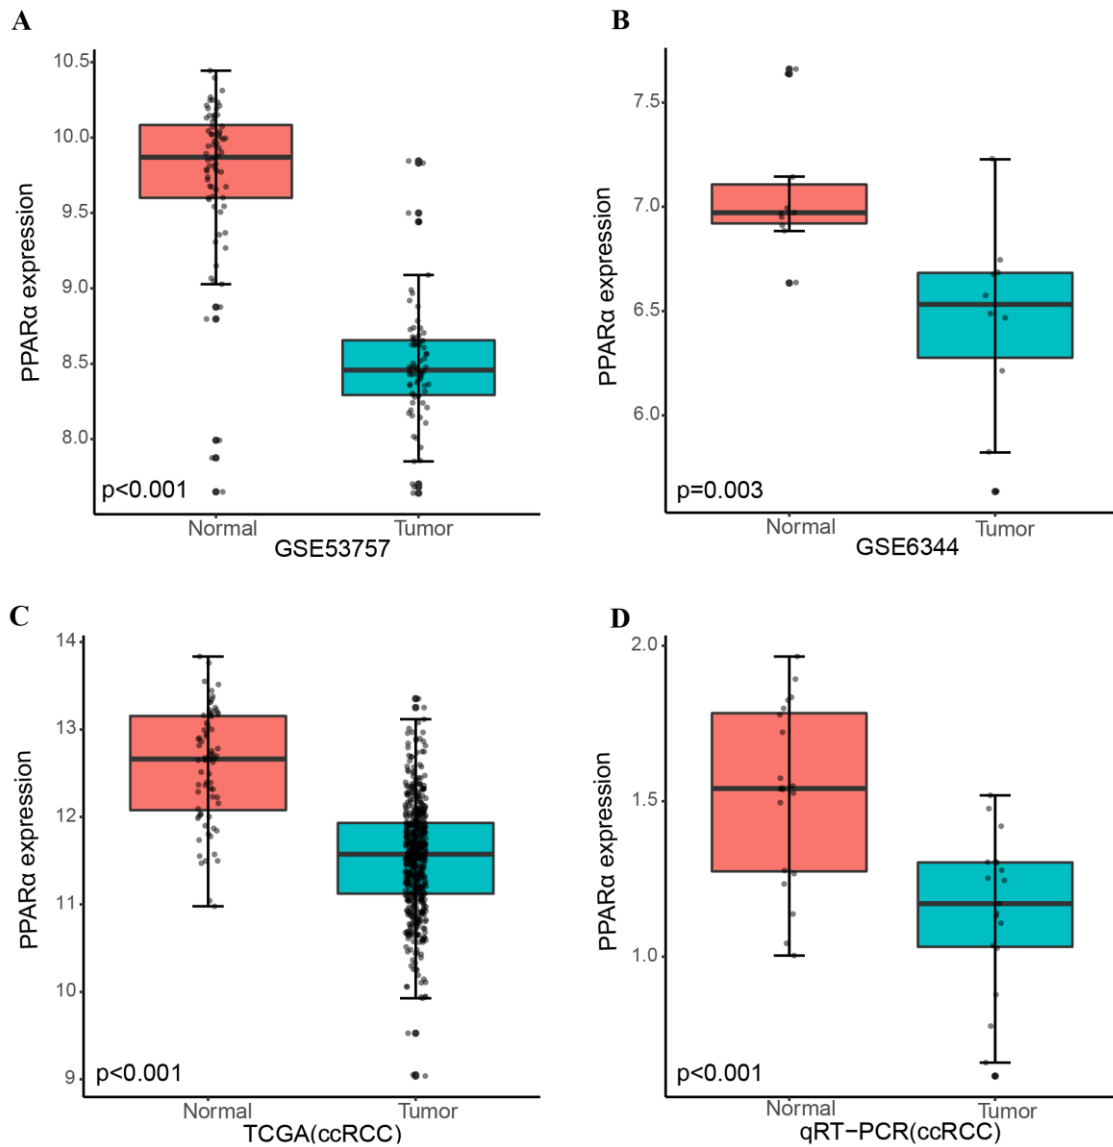

**Figure S1. PPAR $\alpha$  expression is lower in ccRCC tumor tissues compared with the adjacent normal tissues.** Two microarray data from the GEO database, RNA-Seq data from the TCGA database and the qRT-PCR result from department of biological repositories exhibits a strong downregulation of PPARA expression. (A) ccRCC data of GSE53757, (B) ccRCC data of GSE6344 (C) ccRCC data of TCGA database, (D) qRT-PCR result from department of biological repositories. The p value is indicated.

## Supplementary Figure S2

Forest plot summary of analyses of disease-free survival

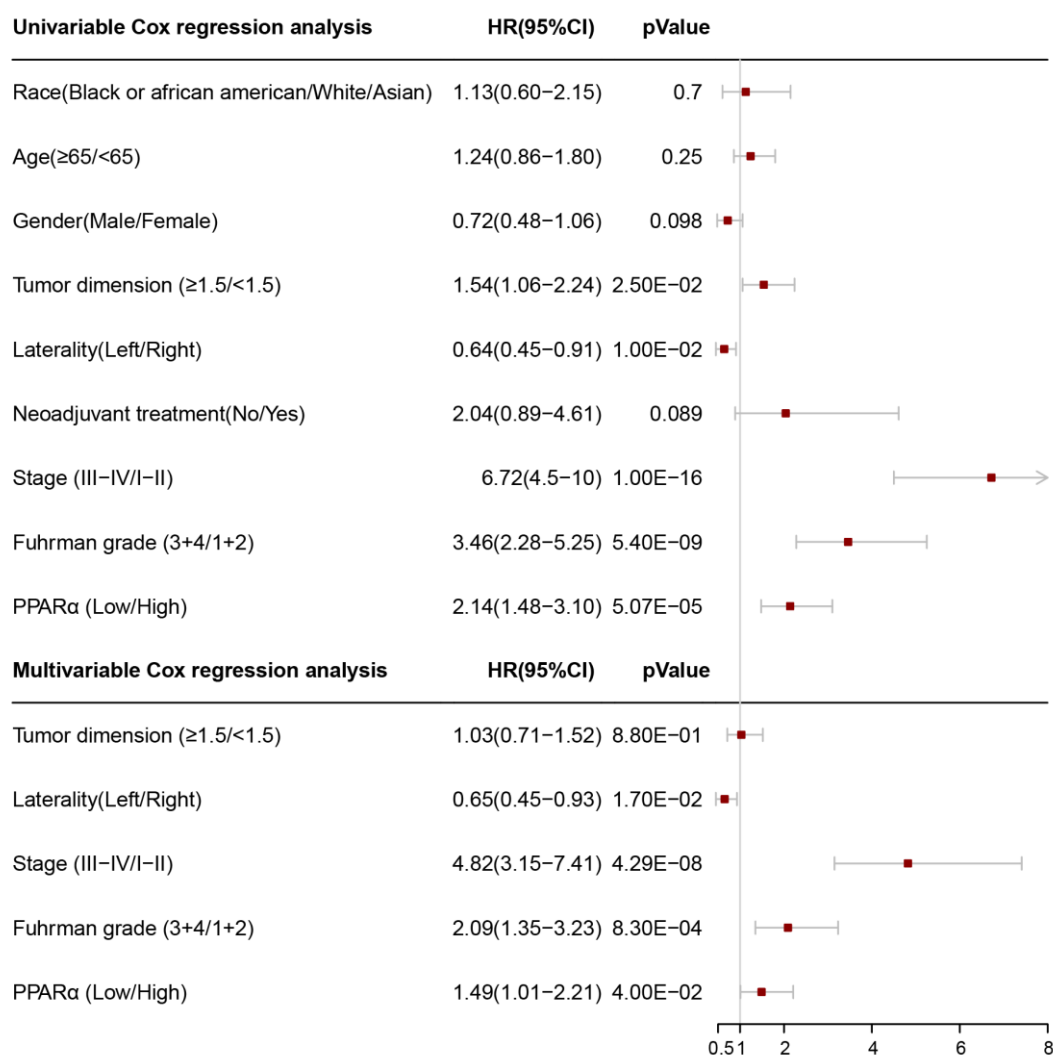

**Figure S2. Forest plot summary of analyses of disease-free survival (DFS).** Univariable and multivariable analyses of race, age, gender, tumor demension, laterality, neoadjuvant therapy, stage, Fuhrman grade and PPAR $\alpha$  expression group for disease-free survival (DFS) in ccRCC patients. The red squares on the transverse lines represent the hazard ratio (HR), and the gray transverse lines represent 95% CI.
